# Supplementary material
Source: Springer Nature journal article supplement (https://www.springermedizin.de/resource/supplementary/13231_2012_68_MOESM1_ESM.pdf/9676450)

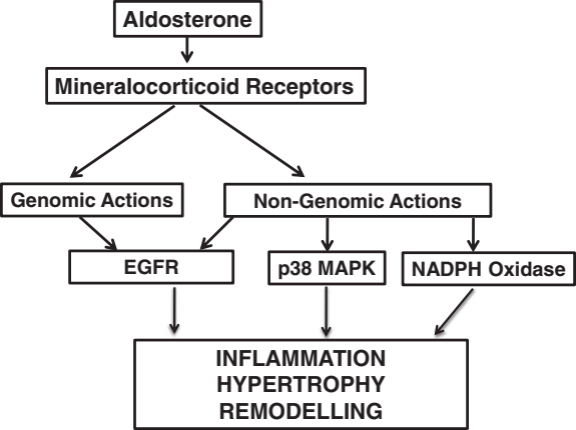

Supplement: MOESM1 [file 9676450]
